# Supplementary material for: Ribonuclease D Processes a Small RNA Regulator of Multicellular Development in Myxobacteria
Source: MDPI journal article supplement (doi:10.3390/genes14051061), 2023-05-09
Supplement: s1 [file Figure S1 and Figure S2.pdf › Figure S1 and Figure S2.pdf]

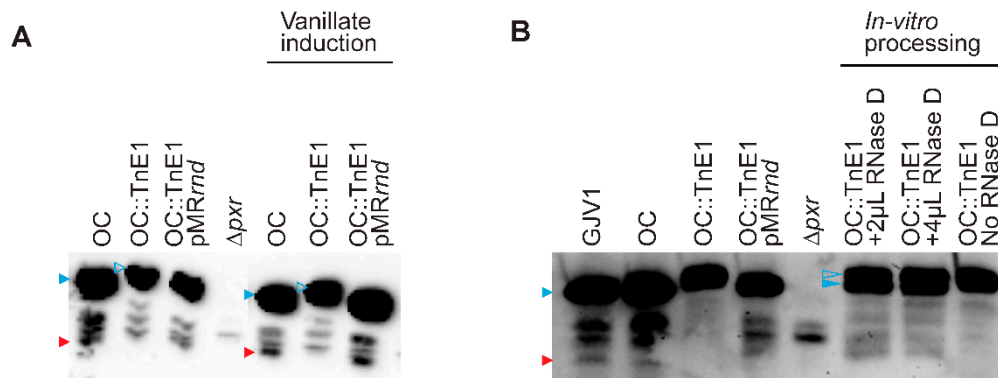

**Figure S1. Northern blot showing Pxr-S.** Longer exposure times of the *in vivo* and *in vitro* Northern blots shown in Figure 4 allow better visualization of Pxr-S but reduce visualization of the distinction between Pxr-XL and Pxr-L. The Northern blots shown for (A) and (B) are the same as for Fig. 4 except with longer exposure. Arrow designations are the same as in Fig. 4.

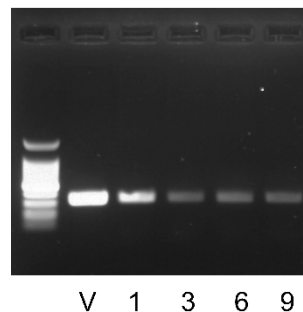

**Figure S2. *rnd*-transcript quantity decreases upon starvation.** Comparison of *rnd*-transcript levels after rt-PCR amplification with *rnd*-specific primers for samples isolated from strain GJV1 at the vegetative mid-log state (V), and 1, 3, 6 and 9 hours post-starvation.
